# Supplementary material for: Simulating Bark Beetle Outbreak Dynamics and their Influence on Carbon Balance Estimates with ORCHIDEE r7791
Source: Copernicus journal article supplement (doi:10.5194/egusphere-2023-1216), 2023-07-06
Supplement: Supplementary file 2 [file egusphere-2023-1216-supplement.pdf]

**Supplementary material S1: The original bark beetle outbreak model of LandClim and the two-step integration into ORCHIDEE**

**Table S1: Main equations of the three versions of the bark beetle outbreak model presented in this study. Subscript “org” refers to the original bark beetle outbreak model (BBO<sub>org</sub>) as presented in Temperli et al. 2013. The subscript “imp” refers to the spatially implicit formulation of a simplified bark beetle outbreak model (BBO<sub>imp</sub>), subscript “orc” refers to the bark beetle outbreak model in ORCHIDEE (BBO<sub>orc</sub>). Subscript “p” represents a patch of 25x25m and “p<sub>t</sub>” denotes the total number of patches. Subscript “lc” refers to landscape scale averages, and subscript “dc” represents the diameter classes in ORCHIDEE.**

| Process                                            | Change in formulation                                                                                                                                                                                                                                                                                                                                                                  | secondary equation                                                                                                                                                                                                                                    |
|----------------------------------------------------|----------------------------------------------------------------------------------------------------------------------------------------------------------------------------------------------------------------------------------------------------------------------------------------------------------------------------------------------------------------------------------------|-------------------------------------------------------------------------------------------------------------------------------------------------------------------------------------------------------------------------------------------------------|
| Susceptibility to drought                          | <p>(1a) <math>SI_{d,org} = \sum_{p_t=1}^{p_t} \left(1 + e^{-d1 \times (DI_{max,p} - d2)}\right)^{-1} \times \frac{1}{p_t}</math></p> <p>(1b) <math>SI_{d,imp} = \left(1 + e^{-d1 \times (DI_{max,lc} - d2)}\right)^{-1}</math></p> <p>(1c) <math>SI_{d,orc} = \sum_{nac=1}^{nac} \left(1 + e^{-d1 \times ((1 - MO_{max,ac}) - d2)}\right)^{-1} \times \frac{Frac_{ac}}{ndc}</math></p> | <p><math>DI_{max,p} = \max(DI_1, \dots, DI_{n-10})</math></p> <p><math>DI_{max,lc} = \sum_{p_t=1}^{p_t} \frac{DI_{max,p}}{p_t}</math></p> <p><math>MO_{max,ac} = \max(MO_1, \dots, MO_{n-3})</math></p>                                               |
| Susceptibility to windthrow                        | <p>(2a) <math>SI_{w,org} = \max\left(\frac{Bdw_p}{Bmax}, \frac{Bdw_k \in D(p,k) &lt; Dw}{Bmax}\right)</math></p> <p>(2b) <math>SI_{w,imp} = \frac{Bdw_{lc}}{Bmax}</math></p> <p>(2c) <math>SI_{w,orc} = \frac{\frac{Litw_{sp}}{Bw_{sp}}}{Lit_{thres}}</math></p>                                                                                                                       | <p><math>Bdw_{lc} = \sum_{p_t=1}^{p_t} \frac{Bdw_p}{p_t}</math></p> <p><math>Lit_{thres}</math><br/>= threshold of breeding substrate at which windthrow susceptibility reaches its maximum</p>                                                       |
| Susceptibility to stem density                     | <p>(3a) <math>SI_{ra} = \sum_{p_t=1}^{p_t} \left(a1 + \frac{1-a1}{1+e^{-a2 \times (Age_p - a3)}}\right) \times \frac{1}{p_t}</math></p> <p>(3b) <math>SI_{ra,imp} = \left(a1 + \frac{1-a1}{1+e^{-a2 \times (Age_{lc} - a3)}}\right)</math></p> <p>(3c) <math>SI_{ra,orc} = \left(a1 + \frac{1-a1}{1+e^{-a2 \times (RDI_{sp} - a3)}}\right)</math></p>                                  | <p><math>RDI_{lc} = \sum_{p_t=1}^{p_t} \frac{RDI_p}{p_t}</math></p>                                                                                                                                                                                   |
| Susceptibility to patch purity                     | <p>(4a) <math>SI_s_{org} = \sum_{p_t=1}^{p_t} \left(s1 + (1-s1)/(1 + s2 \times e^{-s3 \times (Sh_p - s4)})^{s5}\right)^{-1} \times \frac{1}{p_t}</math></p> <p>(4b) <math>SI_s_{imp} = \left(s1 + \frac{1-s1}{1+s2 \times e^{-s3 \times (Sh_{lc} - s4)})^{s5}}\right)^{-1}</math></p> <p>(4c) <math>SI_s_{orc} = \left(1 + e^{-s1 \times (sh_{sp} - s2)}\right)^{-1}</math></p>        | <p><math>Sh_p = \frac{BA_{sp}}{BA_t}</math></p> <p><math>Sh_{lc} = \sum_{p_t=1}^{p_t} \frac{Sh_p}{p_t}</math></p> <p><math>Sh_{sp} = \frac{Frac_{deciduous}}{Frac_{spruce}}</math></p>                                                                |
| Susceptibility of trees to bark beetle infestation | <p>(5a) <math>SI_{org} = \frac{SI_{w,org}}{2} + \frac{SI_{d,org} + SI_{ra,org} + SI_s_{org}}{6}</math></p> <p>(5b) <math>SI_{imp} = \frac{SI_{w,imp}}{2} + \frac{SI_{d,imp} + SI_{ra,imp} + SI_s_{imp}}{6}</math></p> <p>(5c) <math>SI_{orc} = SI_{w,orc} \times Ww + SI_{ra,orc} \times Wr + SI_{d,orc} \times Wd + SI_s_{orc} \times Ws</math></p>                                   | <p><math>Risk_{orc} = \max(RI_{orc,1}, \dots, RI_{orc,n-3})</math></p> <p><math>Ws = 0.1; Wd = 0.1</math></p> <p><math>Wr = (1 + e^{-r1 \times (Risk_{orc} - r2)})^{-1} \times (1 - (Ws + Wd))</math></p> <p><math>Ww = 1 - (Wr + Ws + Wd)</math></p> |

|                                                                    |                                                                                                                                                                                                                                                                                                                                                                                                                                                       |                                                                                   |
|--------------------------------------------------------------------|-------------------------------------------------------------------------------------------------------------------------------------------------------------------------------------------------------------------------------------------------------------------------------------------------------------------------------------------------------------------------------------------------------------------------------------------------------|-----------------------------------------------------------------------------------|
| Susceptibility of trees to mortality after bark beetle infestation | <p>(6a) <math>SI_{p,co} = \max\left(SIw_{p,co}, \frac{SIa_{p,co} + SI d_{p,co}}{2}\right)</math></p> <p>(6b) <math>SI_{p,co} = \max\left(SIw_{p,co}, \frac{SIa_{p,co} + SI d_{p,co}}{2}\right)</math></p> <p>(6c) <math>SI_{ac} = SIr_{ac} \times Wr + SI d_{ac} \times (1 - Wr)</math></p>                                                                                                                                                           |                                                                                   |
| Beetle pressure index                                              | <p>(7a) <math>BPI_{org} = Cbp \times SI_{org} \times \frac{GI + \frac{Bdb_{p,n-1}}{Bmax}}{2}</math></p> <p>(7b) <math>BPI_{imp} = Cbp \times SI_{imp} \times \frac{GI + \frac{Bdb_{imp,n-1}}{Bmax}}{2}</math></p> <p>(7c) <math>BPI_{orc} = Cbp \times SI_{orc} \times \frac{GI + \frac{Bdb_{pix,n-1}}{Bt \times Cst}}{2}</math></p>                                                                                                                  |                                                                                   |
| Risk index                                                         | <p>(8a) <math>RI_{org} = SI_{org} \times BPI_{org}</math></p> <p>(8b) <math>RI_{imp} = SI_{imp} \times BPI_{imp}</math></p> <p>(8c) <math>RI_{orc} = SI_{orc} \times BPI_{orc}</math></p>                                                                                                                                                                                                                                                             |                                                                                   |
| Infested biomass by bark beetle                                    | <p>(9a) <math>Binf_{org} = 150 \times SI_{org} \times BPI_{org} + r_{beta}</math></p> <p>(9b) <math>Binf_{imp} = 150 \times SI_{imp} \times BPI_{imp}</math></p> <p>(9c) <math>Binf_{orc} = Bt \times Cst \times SI_{orc} \times BPI_{orc}</math></p>                                                                                                                                                                                                 | $r_{beta} = \text{random tern}$                                                   |
| Killed biomass by bark beetle                                      | <p>(10a) <math>Bdb_{org} = \sum_{p=1}^{p=1} \sum_{nco=1}^{nco=1} \frac{SI_{p,co} + BPI_{org}}{2} \times Binf_p \times \frac{BA_{sp,co}}{BA_{sp}}</math></p> <p>(10b) <math>Bdb_{imp} = \sum_{nco=1}^{nco=1} \frac{SI_{lc,co} + BPI_{imp}}{2} \times Binf_{imp} \times \frac{BA_{lc,co}}{BA_{sp}}</math></p> <p>(10c) <math>Bdb_{orc} = \sum_{nac=1}^{nac=1} \frac{SI_{ac} + BPI_{orc}}{2} \times Binf_{orc} \times \frac{BA_{ac}}{BA_{sp}}</math></p> | Retrieving $Binf_p$ from $Binf_{org}$ is explained in Temperli <i>et al.</i> 2013 |
